# Supplementary material
Source: Springer Nature journal article supplement (https://www.springermedizin.de/resource/supplementary/12993_2011_366_MOESM7_ESM.pdf/9617630)

**A)**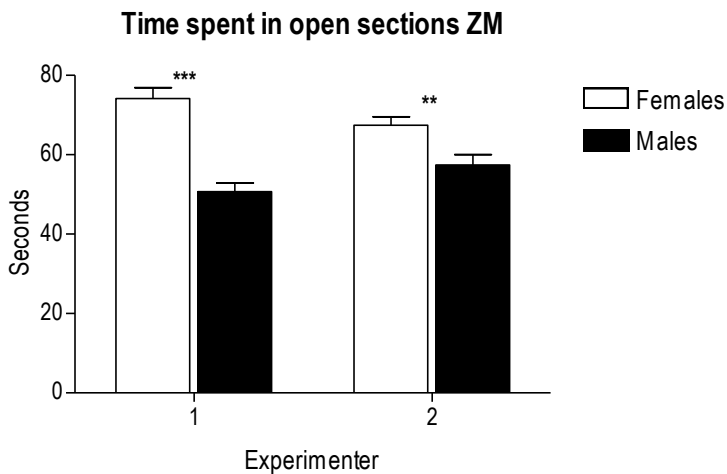**B)**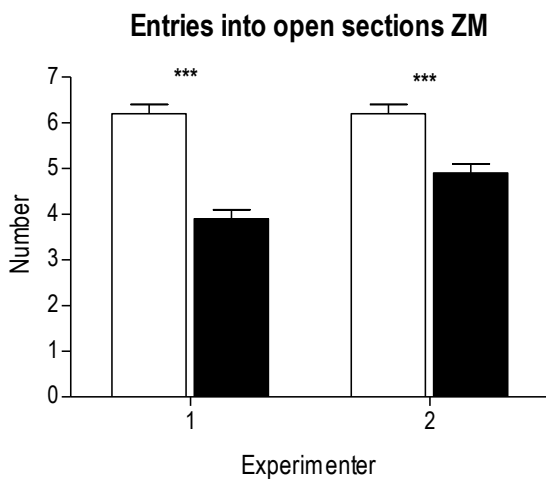**C)**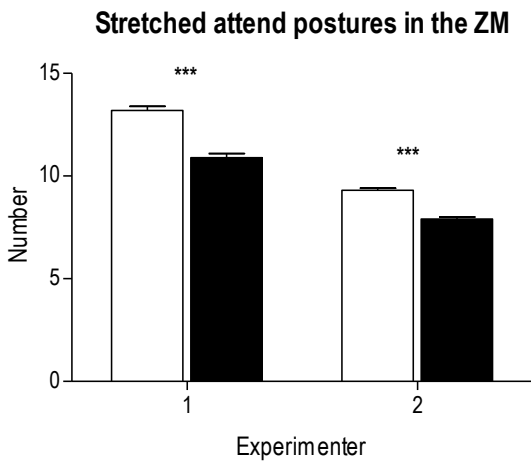

Supplement: MOESM7 [file 9617630]
